# Supplementary material for: Development of AC FIRE version 1.0: A mesoscale model with forest canopy and fire behavior submodels
Source: Copernicus journal article supplement (doi:10.5194/egusphere-2025-5863), 2025-12-29
Supplement: Supplementary file [file egusphere-2025-5863-AC3-supplement.pdf]

## DEVSJAVA3.0 Software Release Form

**Institution:** Georgia State University

**Course Title:** Modeling and Simulation Theory and Application

**Instructor:** Xiaolin Hu

**Semester/Year:** Fall, 2014

**Software Type:** \_\_X\_\_ Source Code

**By signing below, I certify that I have read and accept the terms and conditions described below (next page).**

| No. | Last name, First name, Middle initial | Student ID | Signature | Date |
|-----|---------------------------------------|------------|-----------|------|
| 1   |                                       |            |           |      |
| 2   |                                       |            |           |      |
| 3   |                                       |            |           |      |
| 4   |                                       |            |           |      |
| 5   |                                       |            |           |      |
| 6   |                                       |            |           |      |
| 7   |                                       |            |           |      |
| 8   |                                       |            |           |      |
| 9   |                                       |            |           |      |
| 10  |                                       |            |           |      |
| 11  |                                       |            |           |      |
| 12  |                                       |            |           |      |
| 13  |                                       |            |           |      |
| 14  |                                       |            |           |      |
| 15  |                                       |            |           |      |
| 16  |                                       |            |           |      |
| 17  |                                       |            |           |      |
| 18  |                                       |            |           |      |
| 19  |                                       |            |           |      |
| 20  |                                       |            |           |      |
| 21  |                                       |            |           |      |
| 22  |                                       |            |           |      |
| 23  |                                       |            |           |      |
| 24  |                                       |            |           |      |
| 25  |                                       |            |           |      |
| 26  |                                       |            |           |      |
| 27  |                                       |            |           |      |

## DEVJSJAVA3.0 Software Release Form

**Copyright Arizona Board of Regents on behalf of The University of Arizona; All Rights Reserved.**

**USE & RESTRICTIONS.** This software (i.e., DEVJSJAVA) with ID number UA1885 is disclosed to the Office of Technology Transfer of the University of Arizona. Software is developed by University of Arizona. TUCSON, ARIZONA, USA Copyright (c) 1996-2000. All rights reserved.

DEVJSJAVA in part or in whole IS NOT transferable to any other party, individual or entity without explicit permission from the University of Arizona's Office of Technology Transfer or Arizona Board of Regents.

**NO WARRANTY** THIS SOFTWARE IS PROVIDED "AS IS" AND WITHOUT WARRANTY OF ANY KIND, EXPRESS, IMPLIED OR OTHERWISE, INCLUDING WITHOUT LIMITATION, ANY WARRANTY OF MERCHANTABILITY OR FITNESS FOR A SPECIAL PURPOSE. IN NO EVENT SHALL THE ARIZONA BOARD OF REGENTS ON BEHALF OF THE UNIVERSITY OF ARIZONA BE LIABLE FOR ANY SPECIAL, INCIDENTAL, INDIRECT OR CONSEQUENTIAL DAMAGES OF ANY KIND, OR ANY DAMAGES WHATSOEVER RESULTING FROM LOSS OF USE, DATA OR PROFITS, WHETHER OR NOT ADVISED OF THE POSSIBILITY OF DAMAGE, AND ON ANY THEORY OF LIABILITY, ARISING OUT OF OR IN CONNECTION WITH THE USE OR PERFORMANCE OF THIS SOFTWARE.

I attest that all information I have provided in this license agreement request (Technical or User Point of Contact and if applicable the Legal Point of Contact) is correct and accurate. I also agree to the terms and conditions of this License Agreement.

**This software will be used for CSC8840 course offered in the Computer Science department at Georgia State University, Atlanta, Georgia. This software may be used for other educational purposes such as independent study, course projects, and research that are conducted as part of the Georgia State University education and research mission.**
